# Supplementary material for: Innovative microwave-assisted biosynthesis of copper oxide nanoparticles loaded with platinum(ii) based complex for halting colon cancer: cellular, molecular, and computational investigations
Source: Royal Society of Chemistry journal article supplement (doi:10.1039/d3ra08779d), 2024-01-01
Supplement: d3ra08779d1.pdf [file d3ra08779d1.pdf]

## **Innovative Microwave-Assisted Biosynthesis of Copper Oxide Nanoparticles Loaded with Platinum (II) based Complex for Halting Colon Cancer: Cellular, Molecular, and Computational Investigations**

**Nada K. Sedky<sup>1#</sup>, Iten M. Fawzy<sup>2#</sup>, Afnan Hassan<sup>3</sup>, Noha Khalil Mahdy<sup>4</sup>, Reem T. Attia<sup>5</sup>, Samir N. Shamma<sup>6</sup>, Mohammad Y. Alfaifi<sup>7</sup>, Serag Eldin Elbehairi<sup>7</sup>, Fatma A. Mokhtar<sup>8</sup>, Sherif Ashraf Fahmy<sup>\*9</sup>**

<sup>1</sup>Department of Biochemistry, School of Life and Medical Sciences, University of Hertfordshire Hosted by Global Academic Foundation, R5 New Garden City, New Administrative Capital, Cairo, Egypt

<sup>2</sup>Department of Pharmaceutical Chemistry, Faculty of Pharmacy, Future University in Egypt, 11835, Cairo, Egypt

<sup>3</sup>Biomedical Sciences Program, Zewail City of Science and Technology, Giza, 12578, Egypt

<sup>4</sup>Department of Pharmaceutics and Industrial Pharmacy, Faculty of Pharmacy, Cairo University, Kasr El-Aini Street, 11562 Cairo, Egypt.

<sup>5</sup>Department of Pharmacology and Toxicology and Biochemistry, Faculty of Pharmacy, Future University in Egypt, 11835, Cairo, Egypt

<sup>6</sup>Institute of Global Health and Human Ecology, School of Sciences & Engineering, The American University in Cairo, AUC Avenue, P.O. Box 74, New Cairo 11835, Egypt.

<sup>7</sup>King Khalid University, Faculty of Science, Biology Department, Abha 9004, Saudi Arabia

<sup>8</sup>Department of Pharmacognosy, Faculty of Pharmacy, El Saleheya El Gadida University, El Saleheya El Gadida, Sharkia, 44813, Egypt.

<sup>9</sup>Department of Chemistry, School of Life and Medical Sciences, University of Hertfordshire Hosted by Global Academic Foundation, R5 New Garden City, New Capital, Cairo 11835, Egypt.

<sup>#</sup>Nada K. Sedky and Iten M. Fawzy contributed equally to this work (first co-authors).

### **\*Correspondence:**

Sherif Ashraf Fahmy, Tel +20 1222613344, Email: [sheriffahmy@aucegypt.edu](mailto:sheriffahmy@aucegypt.edu).

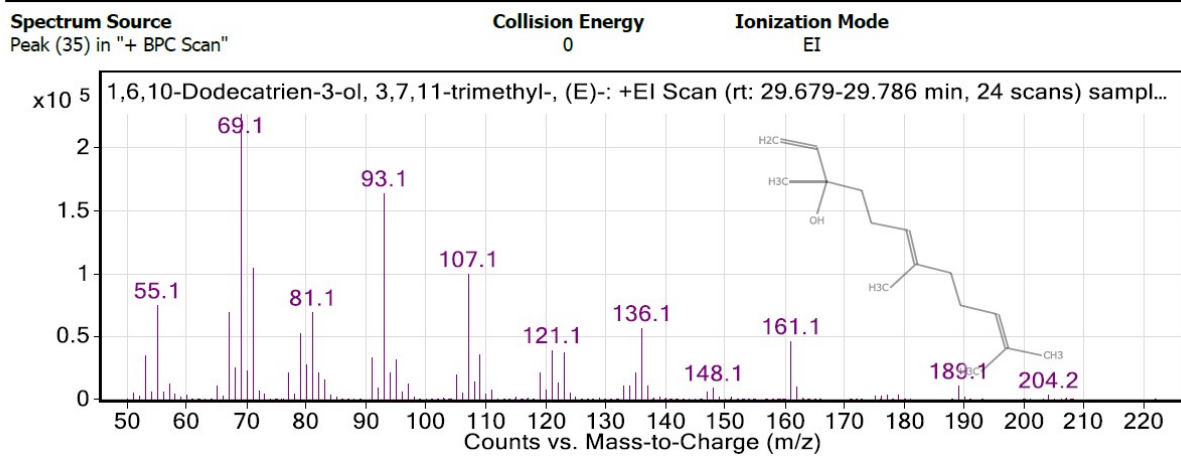

Figure S1. a) The mass spectra of trans-Nerolidol

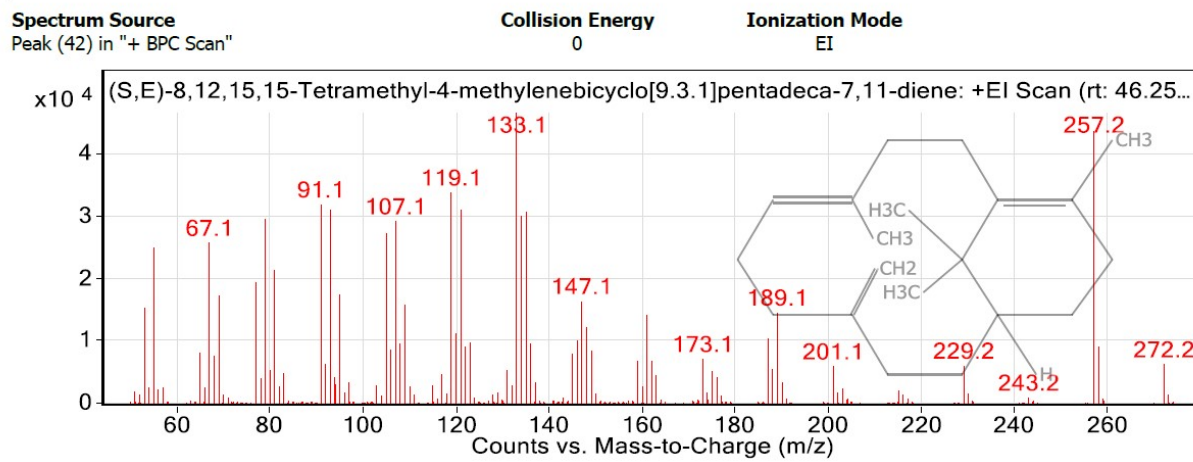

Figure S1. b) The mass spectra of Verticilol

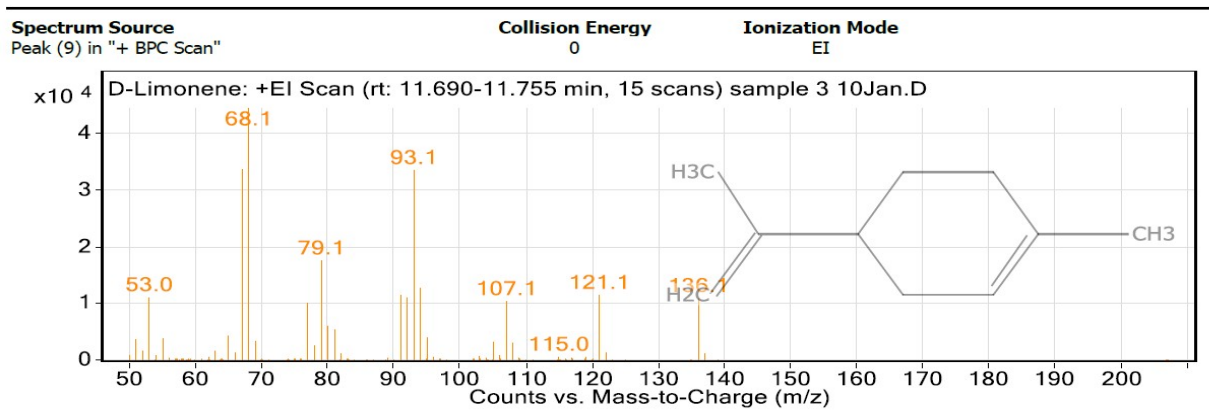

Figure S1. C) The mass spectra of dl-Limonene

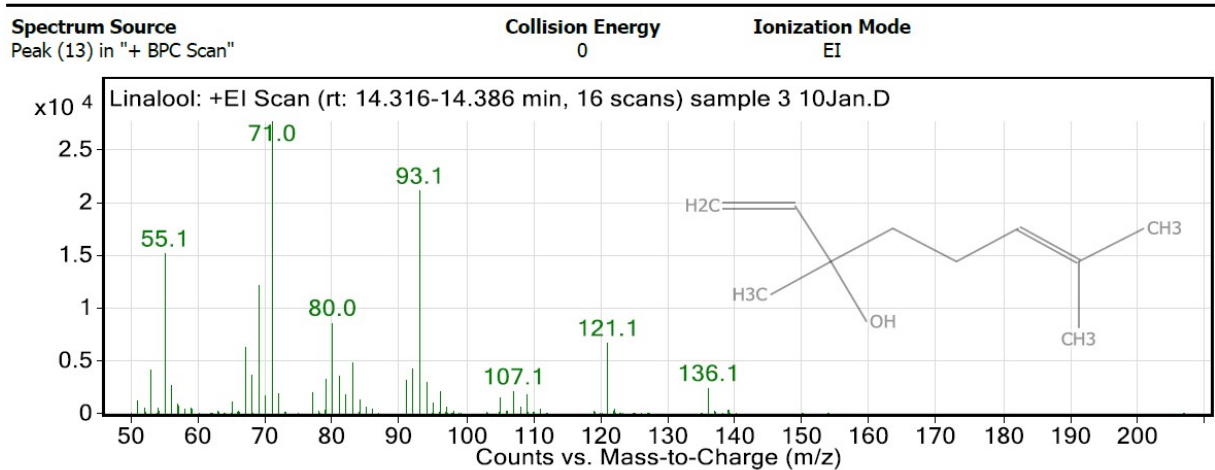

Figure S1. d) The mass spectra of Linalool

## Quantification of Carboplatin

Quantitative determination of drugs was carried out using HPLC (Thermo Fischer Scientific DIONEX ultimate 3000 series), equipped with a photodiode array detector and utilising a BDS Hypersil® C18 reverse-phase column (250 mm × 4.6 mm, 5 mm). The mobile phase consisted of acetonitrile and deionized water (50:50) (v/v) at a flow rate of 1.2 ml/min, with the column temperature maintained at 40°C. The injection volume was 20 µL, and the effluent monitored at 210 and 254 nm for the simultaneous quantification of nedaplatin and ascorbic acid, respectively.

Table S1. Statistical residue analysis

| Statistical Residue Analysis                   |                     |                      |                      |                     |                     |                 |                   |
|------------------------------------------------|---------------------|----------------------|----------------------|---------------------|---------------------|-----------------|-------------------|
| Total Interaction Count                        |                     |                      |                      |                     |                     |                 |                   |
| Fav<br>orab<br>le                              | Unfav<br>orabl<br>e | Hydrog<br>enBon<br>d | Ch<br>arg<br>e       | Hydro<br>phobi<br>c | Hal<br>oge<br>n     | Ot<br>her       |                   |
| 1                                              | 0                   | 0                    | 1                    | 0                   | 0                   | 1               |                   |
| Top 5 Residues with Favorable Interactions (1) |                     |                      |                      |                     |                     |                 |                   |
| Re<br>sid<br>ue                                | Fav<br>ora<br>ble   | Unfa<br>vora<br>ble  | Hydro<br>genBo<br>nd | Ch<br>ar<br>ge      | Hydr<br>opho<br>bic | Hal<br>og<br>en | O<br>th<br>er     |
| :U<br>N<br>K                                   | 1                   | 0                    | 0                    | 1                   | 0                   | 0               | 1                 |
| Top 5 Residues with Charge Interactions (1)    |                     |                      |                      |                     |                     |                 |                   |
| Re<br>sid<br>ue                                | Ch<br>ar<br>ge      | Unfa<br>vora<br>ble  | Hydro<br>genBo<br>nd | Fav<br>ora<br>ble   | Hydr<br>opho<br>bic | Hal<br>og<br>en | O<br>th<br>er     |
| :U<br>N<br>K                                   | 1                   | 0                    | 0                    | 1                   | 0                   | 0               | 1                 |
| Top 5 Residues with Other Interactions (1)     |                     |                      |                      |                     |                     |                 |                   |
| Re<br>sid<br>ue                                | O<br>th<br>er       | Unfa<br>vora<br>ble  | Hydro<br>genBo<br>nd | Ch<br>ar<br>ge      | Hydr<br>opho<br>bic | Hal<br>og<br>en | Fav<br>ora<br>ble |
| :U<br>N<br>K                                   | 1                   | 0                    | 0                    | 1                   | 0                   | 0               | 1                 |
